# Supplementary material for: Hydration and ion association of La3+ and Eu3+ salts in aqueous solution
Source: Royal Society of Chemistry journal article supplement (doi:10.1039/c8cp00248g), 2018-01-01
Supplement: c8cp00248g1.pdf [file c8cp00248g1.pdf]

## Electronic Supplementary Information

### Hydration and ion association of $\text{La}^{3+}$ and $\text{Eu}^{3+}$ in aqueous solution<sup>†</sup>

Sergej Friesen,<sup>a</sup> Sebastian Krickl,<sup>a</sup> Magdalena Luger,<sup>a</sup> Andreas Nazet,<sup>a</sup> Glenn Hefter<sup>b</sup> and Richard Buchner<sup>\*a</sup>

---

<sup>a</sup>Institute of Physical and Theoretical Chemistry, University of Regensburg, 93040 Regensburg, Germany.  
E-mail: richard.buchner@chemie.uni-regensburg.de

<sup>b</sup>Chemistry Department, Murdoch University, Murdoch, WA 6150, Australia.

## Supplementary Measurements

Table S1: Concentrations,  $c$ , densities,  $\rho$ , electrical conductivities,  $\kappa$ , and pH values of investigated aqueous solutions of  $\text{LaCl}_3$  with  $\sim 1$  mM  $\text{HCl}(\text{aq})$  background at  $25^\circ\text{C}$ .

| $c / \text{M}$ | $\rho / \text{g}\cdot\text{cm}^{-3}$ | $\kappa / \text{S}\cdot\text{m}^{-1}$ | pH  |
|----------------|--------------------------------------|---------------------------------------|-----|
| $0^a$          | 0.99708                              | 0.041                                 | 3.1 |
| 0.03972        | 1.00605                              | 1.196                                 | 3.1 |
| 0.06953        | 1.01276                              | 1.950                                 | 3.1 |
| 0.1486         | 1.03011                              | 3.745                                 | 3.0 |
| 0.2957         | 1.06230                              | 6.62                                  | 2.9 |
| 0.4917         | 1.10456                              | 11.81                                 | 2.8 |
| 0.7320         | 1.15464                              | 12.82                                 | 2.6 |
| 0.9664         | 1.20492                              | 14.96                                 | 2.6 |

<sup>a</sup> $\sim 1$  mM  $\text{HCl}(\text{aq})$ .

Table S2: Concentrations,  $c$ , densities,  $\rho$ , electrical conductivities,  $\kappa$ , and pH values of investigated aqueous solutions of  $\text{La}(\text{NO}_3)_3$  with  $\sim 1$  mM  $\text{HNO}_3(\text{aq})$  background at  $25^\circ\text{C}$ .

| $c / \text{M}$ | $\rho / \text{g}\cdot\text{cm}^{-3}$ | $\kappa / \text{S}\cdot\text{m}^{-1}$ | pH  |
|----------------|--------------------------------------|---------------------------------------|-----|
| $0^a$          | 0.99709                              | 0.0451                                | 3.0 |
| 0.004979       | 0.99846                              | 0.212                                 | 3.0 |
| 0.01381        | 1.00091                              | 0.470                                 | 3.0 |
| 0.02790        | 1.00470                              | 0.831                                 | 3.0 |
| 0.05179        | 1.01093                              | 1.382                                 | 3.0 |
| 0.1002         | 1.02477                              | 2.463                                 | 3.0 |
| 0.2083         | 1.05149                              | 4.189                                 | 2.9 |
| 0.2611         | 1.06653                              | 5.037                                 | 2.9 |
| 0.4327         | 1.10869                              | 6.98                                  | 2.8 |
| 0.6050         | 1.15505                              | 8.33                                  | 2.7 |
| 0.7780         | 1.19850                              | 9.13                                  | 2.6 |
| 0.8380         | 1.21270                              | 9.31                                  | 2.6 |

<sup>a</sup> $\sim 1$  mM  $\text{HNO}_3(\text{aq})$ .

Table S3: Concentrations,  $c$ , densities,  $\rho$ , electrical conductivities,  $\kappa$ , and pH values of investigated aqueous solutions of  $\text{La}_2(\text{SO}_4)_3$  with  $\sim 0.5$  mM  $\text{H}_2\text{SO}_4(\text{aq})$  background at  $25^\circ\text{C}$ .

| $c / \text{M}$ | $\rho / \text{g}\cdot\text{cm}^{-3}$ | $\kappa / \text{S}\cdot\text{m}^{-1}$ | pH  |
|----------------|--------------------------------------|---------------------------------------|-----|
| $0^a$          | 0.99710                              | 0.0387                                | 3.2 |
| 0.00356        | 0.99925                              | 0.164                                 | –   |
| 0.00705        | 1.00136                              | 0.266                                 | –   |
| 0.0106         | 1.00349                              | 0.358                                 | –   |
| 0.0180         | 1.00770                              | 0.531                                 | –   |
| 0.0212         | 1.00977                              | 0.609                                 | –   |
| 0.0283         | 1.01395                              | 0.766                                 | –   |
| 0.0357         | 1.01799                              | 0.898                                 | 2.5 |

<sup>a</sup> $\sim 0.5$  mM  $\text{H}_2\text{SO}_4(\text{aq})$ .

Table S4: Concentrations,  $c$ , densities,  $\rho$ , electrical conductivities,  $\kappa$ , and pH values of investigated aqueous solutions of  $\text{Eu}(\text{NO}_3)_3$  with  $\sim 0.225$  M  $\text{HNO}_3(\text{aq})$  background at  $25^\circ\text{C}$ .

| $c / \text{M}$ | $\rho / \text{g}\cdot\text{cm}^{-3}$ | $\kappa / \text{S}\cdot\text{m}^{-1}$ | pH  |
|----------------|--------------------------------------|---------------------------------------|-----|
| $0^a$          | 1.00459                              | 8.48                                  | 0.7 |
| 0.01551        | 1.00899                              | 8.73                                  | 0.6 |
| 0.03083        | 1.01342                              | 8.97                                  | 0.6 |
| 0.05379        | 1.01989                              | 9.22                                  | 0.6 |
| 0.1147         | 1.03615                              | 10.05                                 | 0.5 |
| 0.2276         | 1.06610                              | 12.33                                 | 0.5 |

<sup>a</sup> $\sim 0.225$  M  $\text{HNO}_3(\text{aq})$ .

Table S5: Concentrations,  $c$ , densities,  $\rho$ , electrical conductivities,  $\kappa$ , and pH values of investigated aqueous solutions of  $\text{Eu}_2(\text{SO}_4)_3$  with  $\sim 1$  mM  $\text{H}_2\text{SO}_4(\text{aq})$  background at  $25^\circ\text{C}$ .

| $c / \text{M}$ | $\rho / \text{g}\cdot\text{cm}^{-3}$ | $\kappa / \text{S}\cdot\text{m}^{-1}$ | pH  |
|----------------|--------------------------------------|---------------------------------------|-----|
| $0^a$          | 0.99714                              | 0.0822                                | 2.8 |
| 0.004001       | 0.99949                              | 0.155                                 | 2.9 |
| 0.007966       | 1.00183                              | 0.211                                 | 2.9 |
| 0.01194        | 1.00414                              | 0.261                                 | 2.8 |
| 0.01492        | 1.00593                              | 0.298                                 | 2.8 |
| 0.01787        | 1.00766                              | 0.331                                 | 2.8 |
| 0.02086        | 1.00934                              | 0.360                                 | 2.8 |
| 0.02490        | 1.01165                              | 0.407                                 | 2.8 |

<sup>a</sup> $\sim 1$  mM  $\text{H}_2\text{SO}_4(\text{aq})$ .

## Dielectric Spectra and their Fits

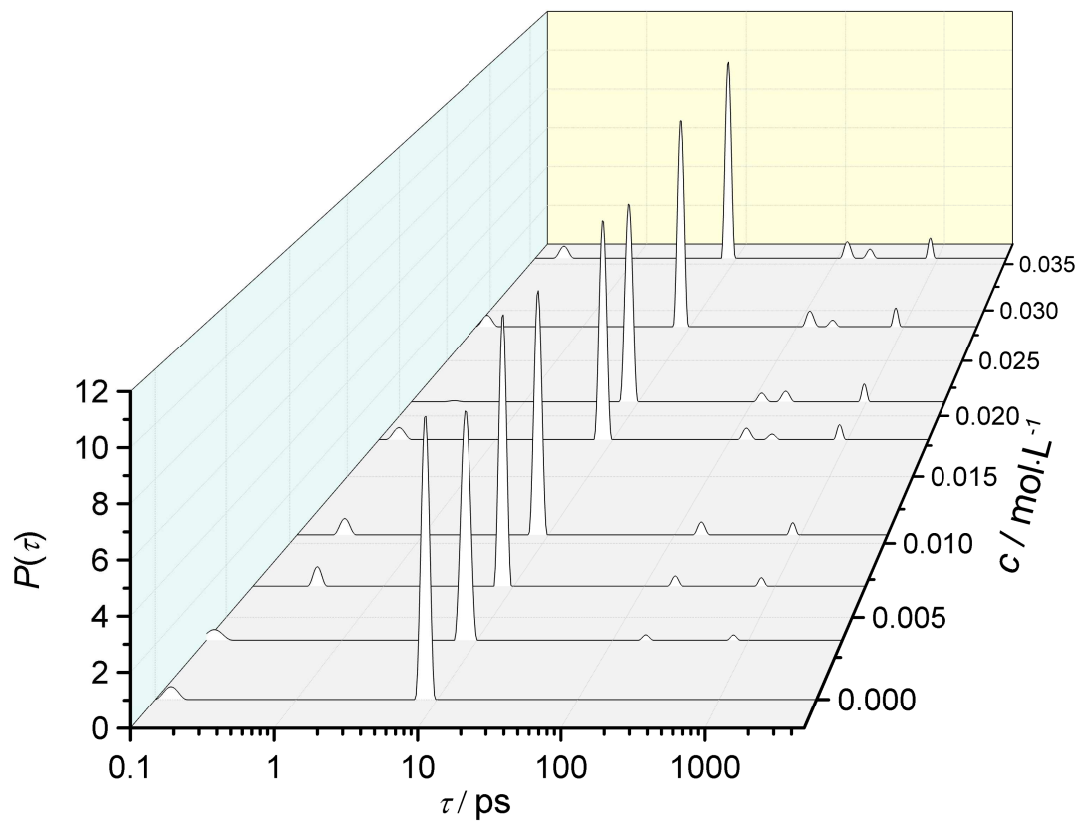

Figure S1: Relaxation-time distribution function,  $P(\tau)$ , obtained with the method of Zasetky<sup>1</sup> for the present dielectric spectra of aqueous  $\text{La}_2(\text{SO}_4)_3$  at 25 °C. In addition to the dominant bulk-water contribution at  $\tau \approx 8.2$ , a peak from fast water at  $\tau < 0.4$  ps (too low to be resolved in the fit with Eq. (6) of the Main Manuscript) and two solute-related modes at  $\sim 150$  ps and  $\sim 700$  ps are clearly revealed. Due to the small amplitudes of the solute relaxations the suggested splitting of the  $\sim 150$  ps mode at  $c \geq 0.018$  M is too weak to be resolved in a fit with Eq. (6).

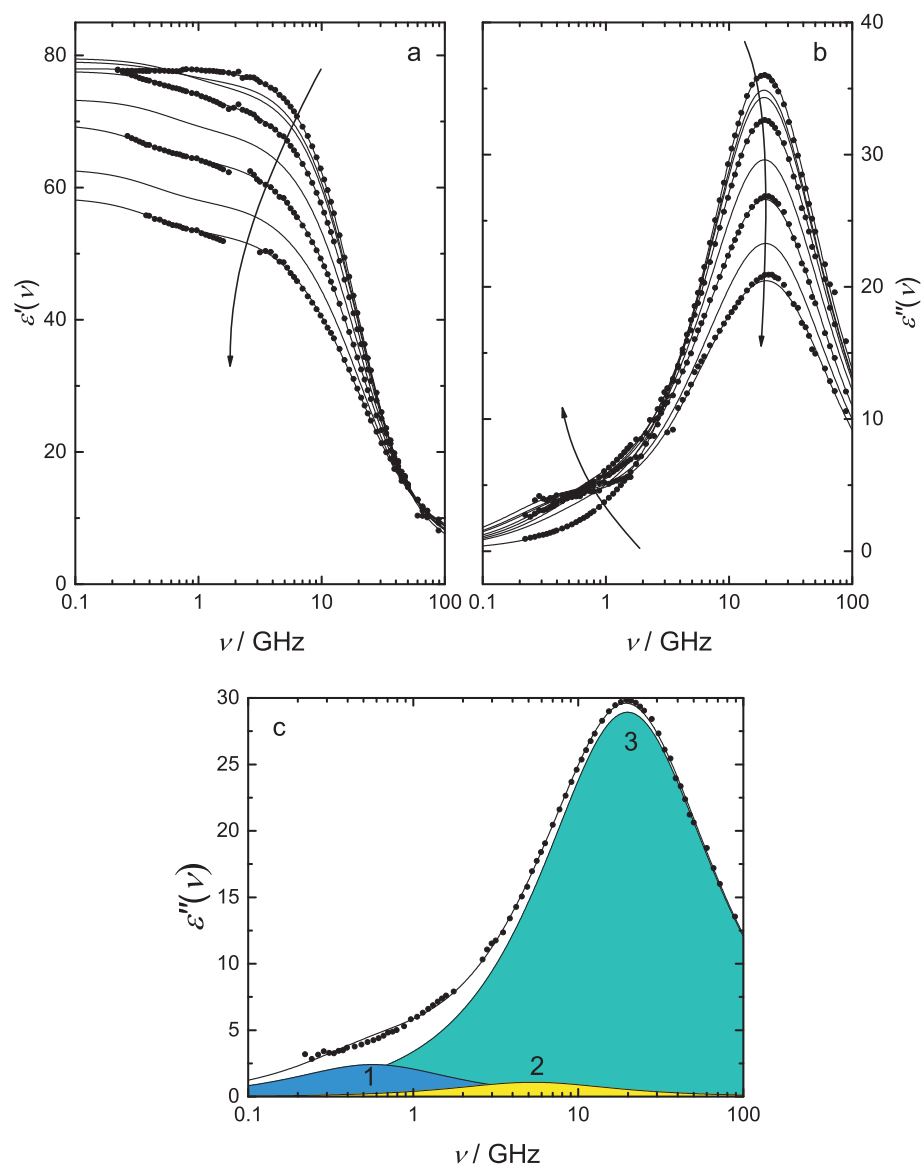

Figure S2: (a) Relative permittivity,  $\epsilon'(\nu)$ , and (b) dielectric loss,  $\epsilon''(\nu)$ , spectra of LaCl<sub>3</sub>(aq) at 25 °C and solute concentrations  $0 \leq c / \text{M} \leq 0.9664$ . The symbols represent the experimental data (partially omitted for visual clarity) while the lines are fits with a {D}+D+CC model. The arrows indicate the trend in the spectra with increasing  $c$ . (c) Dielectric loss,  $\epsilon''(\nu)$ , spectrum of  $c = 0.2957$  M LaCl<sub>3</sub>(aq) with shaded areas indicating the resolved modes of a D+D+CC model.

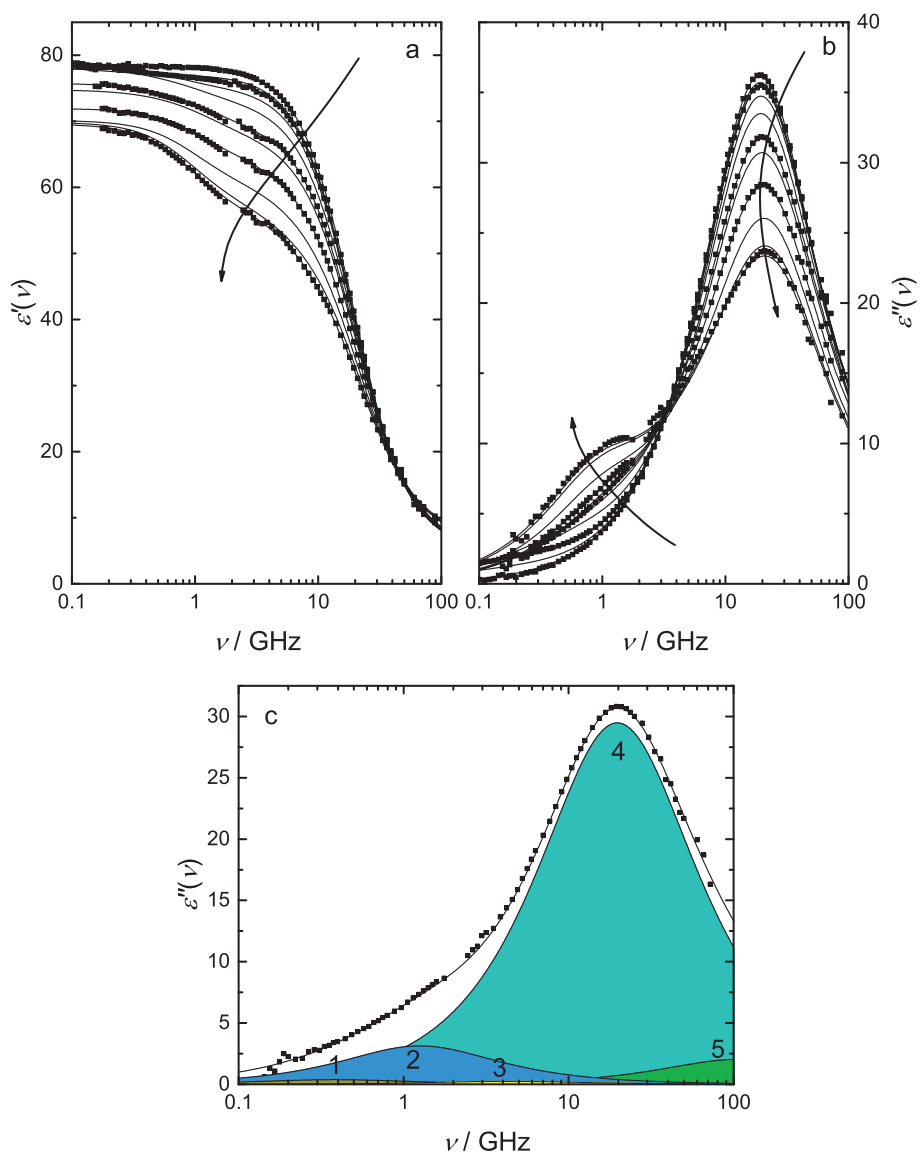

Figure S3: (a) Relative permittivity,  $\epsilon'(\nu)$ , and (b) dielectric loss,  $\epsilon''(\nu)$ , spectra of  $\text{La}(\text{NO}_3)_3(\text{aq})$  at  $25^\circ\text{C}$  and solute concentrations  $0 \leq c / \text{M} \leq 0.8380$ . The symbols represent the experimental data (partially omitted for visual clarity) while the lines are fits with a  $\{\text{D}\}+\text{D}+\text{D}+\text{D}+\text{D}$  model. The arrows indicate the trend in the spectra with increasing  $c$ . (c) Dielectric loss,  $\epsilon''(\nu)$ , spectrum of  $c = 0.2611$  M  $\text{La}(\text{NO}_3)_3(\text{aq})$  with shaded areas indicating the resolved modes of a  $\text{D}+\text{D}+\text{D}+\text{D}+\text{D}$  model.

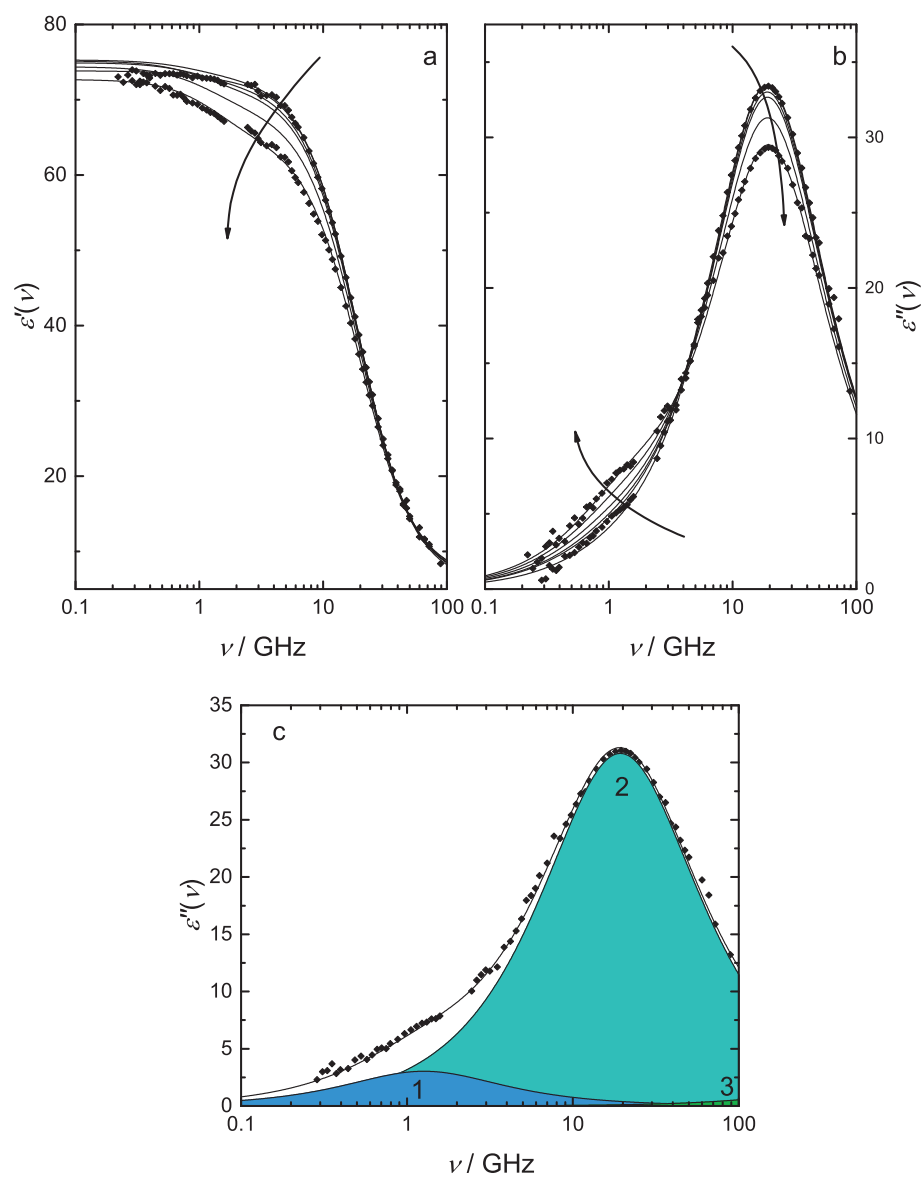

Figure S4: (a) Relative permittivity,  $\epsilon'(\nu)$ , and (b) dielectric loss,  $\epsilon''(\nu)$ , spectra of  $\text{Eu}(\text{NO}_3)_3(\text{aq})$  at  $25^\circ\text{C}$  and solute concentrations  $0 \leq c / \text{M} \leq 0.2276$ . The symbols represent the experimental data (partially omitted for visual clarity) while the lines are fits with a D+D+D model. The arrows indicate the trend in the spectra with increasing  $c$ . (c) Dielectric loss,  $\epsilon''(\nu)$ , spectrum of  $c = 0.1147\text{ M}$   $\text{Eu}(\text{NO}_3)_3(\text{aq})$  with shaded areas indicating the resolved modes of a D+D+D model.



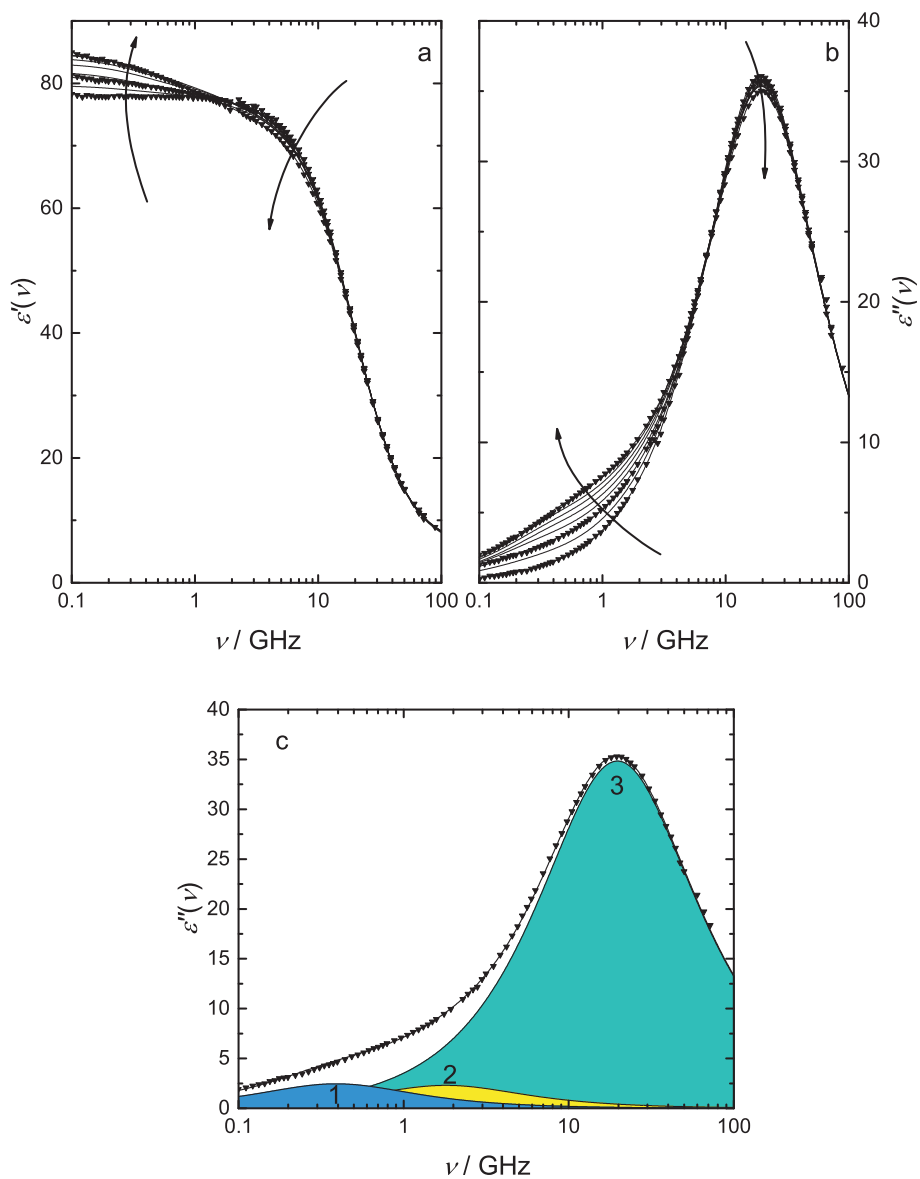

Figure S5: (a) Relative permittivity,  $\epsilon'(\nu)$ , and (b) dielectric loss,  $\epsilon''(\nu)$ , spectra of  $\text{Eu}_2(\text{SO}_4)_3(\text{aq})$  at  $25^\circ\text{C}$  and solute concentrations  $0 \leq c/\text{M} \leq 0.0249$ . The symbols represent the experimental data (partially omitted for visual clarity) while the lines are fits with a D+D+D model. The arrows indicate the trend in the spectra with increasing  $c$ . (c) Dielectric loss,  $\epsilon''(\nu)$ , spectrum of  $c = 0.0209 \text{ M}$   $\text{Eu}_2(\text{SO}_4)_3(\text{aq})$  with shaded areas indicating the resolved modes of a D+D+D model.

Table S6: Static permittivity,  $\epsilon$ , relaxation amplitudes,  $S_j$  ( $j = 1 \dots 3$ ), relaxation times,  $\tau_j$ , shape parameter,  $\alpha_3$ , and infinite frequency permittivity,  $\epsilon_\infty$ , of the {D+} D+CC model fitted to the DR spectra of  $\text{LaCl}_3(\text{aq})$  at 25 °C and molar concentration  $c$ .<sup>a</sup>

| $c / \text{M}$ | $\epsilon$ | $S_1$ | $\tau_1 / \text{ps}$ | $S_2$ | $\tau_2 / \text{ps}$ | $S_3$ | $\alpha_3$ | $\tau_3 / \text{ps}$ | $\epsilon_\infty$ |
|----------------|------------|-------|----------------------|-------|----------------------|-------|------------|----------------------|-------------------|
| 0              | 77.97      | –     | –                    | –     | –                    | 73.18 | 0.008      | 8.20                 | 4.79              |
| 0.03972        | 79.06      | 2.89  | 268                  | –     | –                    | 70.54 | 0.011      | 8.26                 | 5.43              |
| 0.06953        | 78.85      | 3.91  | 171                  | –     | –                    | 69.57 | 0.012      | 8.20                 | 5.37              |
| 0.1486         | 77.62      | 5.08  | 221                  | 0.84  | 30F                  | 66.69 | 0.024      | 8.14                 | 5.12              |
| 0.2957         | 73.38      | 4.82  | 279                  | 2.15  | 30F                  | 61.19 | 0.036      | 8.01                 | 5.22              |
| 0.4917         | 69.58      | 5.53  | 436                  | 5.50  | 29.8                 | 52.53 | 0.028      | 7.66                 | 6.02              |
| 0.7320         | 62.78      | 5.14  | 366                  | 7.42  | 22.1                 | 43.97 | 0.033      | 7.23                 | 6.25              |
| 0.9664         | 58.44      | 5.46  | 387                  | 11.33 | 19.6                 | 35.07 | 0.031      | 6.49                 | 6.58              |

<sup>a</sup> Parameter values followed by “F” were fixed

Table S7: Static permittivity,  $\epsilon$ , relaxation amplitudes,  $S_j$  ( $j = 1 \dots 5$ ), relaxation times,  $\tau_j$ , and infinite frequency permittivity,  $\epsilon_\infty$ , of the {D+} D+D+D model fitted to the DR spectra of  $\text{La}(\text{NO}_3)_3(\text{aq})$  at 25 °C and molar concentration  $c$ .<sup>a</sup>

| $c / \text{M}$ | $\epsilon$ | $S_1$ | $\tau_1 / \text{ps}$ | $S_2$ | $\tau_2 / \text{ps}$ | $S_3$ | $\tau_3 / \text{ps}$ | $S_4$ | $\tau_4 / \text{ps}$ | $S_5$ | $\tau_5 / \text{ps}$ | $\epsilon_\infty$ |
|----------------|------------|-------|----------------------|-------|----------------------|-------|----------------------|-------|----------------------|-------|----------------------|-------------------|
| 0              | 78.30      | –     | –                    | –     | –                    | –     | –                    | 72.42 | 8.31                 | –     | –                    | 5.87              |
| 0.004979       | 78.39      | 0.97  | 1298                 | 0.38  | 479                  | –     | –                    | 70.85 | 8.38                 | 2.40  | 0.86                 | 3.78              |
| 0.01381        | 79.58      | 2.08  | 1103                 | 0.99  | 283                  | –     | –                    | 69.94 | 8.38                 | 3.05  | 1.06                 | 3.52F             |
| 0.02790        | 79.48      | 2.11  | 999                  | 0.86  | 258                  | –     | –                    | 69.94 | 8.38                 | 3.05  | 1.06                 | 3.52F             |
| 0.05179        | 79.10      | 0.71  | 618                  | 3.31  | 240                  | –     | –                    | 68.54 | 8.25                 | 3.71  | 0.77                 | 2.82              |
| 0.1002         | 78.77      | 1.79  | 641                  | 4.31  | 145                  | –     | –                    | 65.44 | 8.27                 | 4.76  | 0.88                 | 2.47              |
| 0.2083         | 75.76      | 1.28  | 369                  | 5.35  | 122                  | –     | –                    | 61.56 | 8.09                 | 4.05  | 1.09                 | 3.52F             |
| 0.2611         | 74.77      | 0.76  | 415                  | 6.26  | 127                  | 0.49  | 37.2                 | 58.95 | 8.07                 | 4.08  | 1.47                 | 4.23              |
| 0.4327         | 71.94      | –     | –                    | 7.51  | 150                  | 2.96  | 31.1                 | 53.53 | 7.69                 | 5.58  | 0.66                 | 2.36              |
| 0.6050         | 70.14      | –     | –                    | 9.87  | 158                  | 4.52  | 24.4                 | 47.83 | 7.35                 | 4.41  | 0.64                 | 3.51              |
| 0.7780         | 69.86      | –     | –                    | 12.55 | 169                  | 5.08  | 29.7                 | 43.82 | 7.20                 | 4.57  | 0.68                 | 3.84              |
| 0.8380         | 69.60      | –     | –                    | 13.37 | 173                  | 8.61  | 21.4                 | 39.68 | 6.77                 | 4.46  | 0.58                 | 3.48              |

<sup>a</sup> Parameter values followed by “F” were fixed

Table S8: Static permittivity,  $\epsilon$ , relaxation amplitudes,  $S_j$  ( $j = 1 \dots 3$ ), relaxation times,  $\tau_j$ , and infinite frequency permittivity,  $\epsilon_\infty$ , of the D+D+D model fitted to the DR spectra of  $\text{La}_2(\text{SO}_4)_3(\text{aq})$  at 25 °C and molar concentration  $c$ .

| $c / \text{M}$ | $\epsilon$ | $S_1$ | $\tau_1 / \text{ps}$ | $S_2$ | $\tau_2 / \text{ps}$ | $S_3$ | $\tau_3 / \text{ps}$ | $\epsilon_\infty$ |
|----------------|------------|-------|----------------------|-------|----------------------|-------|----------------------|-------------------|
| 0              | 77.71      | –     | –                    | –     | –                    | 72.33 | 8.21                 | 5.38              |
| 0.00356        | 79.43      | 0.94  | 613                  | 1.01  | 146                  | 72.06 | 8.19                 | 5.42              |
| 0.00705        | 80.46      | 1.80  | 539                  | 1.92  | 131                  | 71.62 | 8.14                 | 5.13              |
| 0.0106         | 82.23      | 2.33  | 697                  | 3.23  | 142                  | 71.15 | 8.17                 | 5.51              |
| 0.0180         | 84.30      | 3.32  | 666                  | 4.98  | 141                  | 70.54 | 8.15                 | 5.46              |
| 0.0212         | 85.45      | 3.61  | 800                  | 6.23  | 148                  | 70.06 | 8.18                 | 5.55              |
| 0.0283         | 86.59      | 4.31  | 649                  | 7.41  | 138                  | 69.38 | 8.16                 | 5.50              |
| 0.0357         | 88.15      | 5.13  | 602                  | 8.58  | 132                  | 68.84 | 8.15                 | 5.60              |

Table S9: Static permittivity,  $\epsilon$ , relaxation amplitudes,  $S_j$  ( $j = 1 \dots 3$ ), relaxation times,  $\tau_j$ , and infinite frequency permittivity,  $\epsilon_\infty$ , of the D+D+D model fitted to the DR spectra of  $\text{Eu}(\text{NO}_3)_3(\text{aq})$  at 25 °C and molar concentration  $c$ .<sup>a</sup>

| $c / \text{M}$ | $\epsilon$ | $S_1$ | $\tau_1 / \text{ps}$ | $S_2$ | $\tau_2 / \text{ps}$ | $S_3$ | $\tau_3 / \text{ps}$ | $\epsilon_\infty$ |
|----------------|------------|-------|----------------------|-------|----------------------|-------|----------------------|-------------------|
| 0              | 73.84      | 1.22  | 148                  | 66.65 | 8.32                 | 2.44  | 0.28F                | 3.52F             |
| 0.01551        | 75.29      | 2.45  | 161                  | 66.45 | 8.40                 | 2.88  | 0.28F                | 3.52F             |
| 0.03083        | 74.92      | 3.19  | 143                  | 65.47 | 8.31                 | 2.74  | 0.28F                | 3.52F             |
| 0.05379        | 75.15      | 4.19  | 141                  | 64.66 | 8.29                 | 2.79  | 0.28F                | 3.52F             |
| 0.1147         | 74.38      | 6.07  | 126                  | 61.59 | 8.23                 | 3.20  | 0.28F                | 3.52F             |
| 0.2276         | 72.69      | 8.39  | 113                  | 57.60 | 8.03                 | 3.19  | 0.28F                | 3.52F             |

<sup>a</sup> Parameter values followed by “F” were fixed

Table S10: Static permittivity,  $\epsilon$  ( $= \epsilon_\infty + \sum S_j$ ), relaxation amplitudes,  $S_j$  ( $j = 1 \dots 3$ ), relaxation times,  $\tau_j$ , and infinite frequency permittivity,  $\epsilon_\infty$ , of the D+D+D model fitted to the DR spectra of  $\text{Eu}_2(\text{SO}_4)_3(\text{aq})$  at 25 °C and molar concentration  $c$ .<sup>a</sup>

| $c / \text{mol}\cdot\text{dm}^{-3}$ | $\epsilon$ | $S_1$ | $\tau_1 / \text{ps}$ | $S_2$ | $\tau_2 / \text{ps}$ | $S_3$ | $\tau_3 / \text{ps}$ | $\epsilon_\infty$ |
|-------------------------------------|------------|-------|----------------------|-------|----------------------|-------|----------------------|-------------------|
| 0                                   | 77.92      | –     | –                    | –     | –                    | 72.17 | 8.28                 | 5.75              |
| 0.004001                            | 79.67      | 1.40  | 540F                 | 1.20  | 90.0F                | 71.41 | 8.22                 | 5.66              |
| 0.007966                            | 81.15      | 2.37  | 503                  | 2.15  | 90.5                 | 70.95 | 8.19                 | 5.69              |
| 0.01194                             | 81.87      | 3.02  | 510                  | 3.16  | 99.3                 | 70.07 | 8.13                 | 5.61              |
| 0.01492                             | 83.18      | 3.95  | 418                  | 3.44  | 84.6                 | 70.12 | 8.11                 | 5.67              |
| 0.01787                             | 84.10      | 4.25  | 433                  | 4.15  | 94.7                 | 69.94 | 8.13                 | 5.76              |
| 0.02086                             | 84.80      | 4.91  | 409                  | 4.60  | 88.2                 | 69.66 | 8.07                 | 5.62              |
| 0.02490                             | 84.70      | 5.37  | 382                  | 5.07  | 89.9                 | 68.85 | 8.00                 | 5.41              |

<sup>a</sup> Parameter values followed by “F” were fixed

## Correction for Kinetic Depolarization

Ions moving in an applied electric field exert a torque on neighboring dipolar solvent molecules. This additional force opposes the reorienting force originating from the applied field,  $\vec{E}$ , resulting in a depolarization of the bulk solvent molecules. Experimentally, this depolarization is expressed as a reduction of the apparent bulk solvent amplitude,  $S_b^{\text{ap}}$ , by a kinetic dielectric increment,  $\Delta\epsilon_{\text{kd}}$ . Thus, the corrected equilibrium solvent amplitude,  $S_b^{\text{eq}}$ , is

$$S_b^{\text{eq}} = S_b^{\text{ap}} + \Delta\epsilon_{\text{kd}} \quad (1)$$

The continuum model of Hubbard and Onsager<sup>2-4</sup> (HO) is frequently used for the correction of experimental DRS data. In this approach the dielectric increment can be written as

$$\Delta\epsilon_{\text{kd}}^{\text{HO}} = p \cdot \frac{\epsilon(0) - \epsilon_\infty(0)}{\epsilon(0)} \cdot \frac{\tau(0)}{\epsilon_0} \cdot \kappa \quad (2)$$

where  $\epsilon_0$  is the vacuum permittivity,  $\epsilon(0)$  and  $\epsilon_\infty(0)$  are the static and the infinite frequency permittivities of the neat solvent,  $\tau(0)$  is the relaxation time of the dominant dispersion step,  $\kappa$  the solution electrical conductivity, and  $p$  a hydrodynamic parameter which describes the coupling of ion translational motions to macroscopic viscosity. For  $p = 1$ , so-called *stick*, and for  $p = 2/3$  *slip*, boundary conditions apply. Generally, *slip* conditions are considered as the most physically realistic<sup>5,6</sup> and so were chosen for further analysis since they gave consistent results for limiting ( $c \rightarrow 0$ ) hydration numbers of the ions.

Table S11: Effective radii,  $R$ , of the ions of the present salts in solution used for the correction of kinetic depolarization.

| Salt            | LaCl <sub>3</sub> | La(NO <sub>3</sub> ) <sub>3</sub> | La <sub>2</sub> (SO <sub>4</sub> ) <sub>3</sub> | Eu(NO <sub>3</sub> ) <sub>3</sub> | Eu <sub>2</sub> (SO <sub>4</sub> ) <sub>3</sub> |
|-----------------|-------------------|-----------------------------------|-------------------------------------------------|-----------------------------------|-------------------------------------------------|
| $R / \text{nm}$ | 0.286             | 0.285                             | 0.453                                           | 0.280                             | 0.448                                           |

The HO theory is only valid at infinite dilution of the electrolyte and thus is problematic for concentrated solutions. Recently, Segal *et al.* introduced a modification of the HO equation to account for finite salt concentrations<sup>7</sup>

$$\Delta\epsilon_{\text{kd}}^{\text{Sega}} = \Delta\epsilon_{\text{kd}}^{\text{HO}} \cdot \exp(\sigma R) \cdot (\sigma R + 2)/2 \quad (3)$$

where  $\sigma$  is the reciprocal Debye length and  $R$  the effective ion radius. Whereas the former quantity can readily be calculated, the determination of the latter is not straightforward. In this work,  $R = (r_+ + n \cdot d_w + r_-)/2$  was used for the

effective radius. Here,  $r_+$  and  $r_-$  are the crystallographic radii of the cation and anion,<sup>8</sup>  $d_w$  the diameter of a water molecule and  $n$  a factor varying from 1 to 2 depending on the present anion. For poorly hydrated  $\text{Cl}^-$  and  $\text{NO}_3^-$ ,  $n = 1$  was inserted whereas for  $\text{SO}_4^{2-}$   $n = 2$  was utilized. The so obtained effective radii are summarized in Table S11.

## Coordination Numbers of $\text{La}^{3+}(\text{aq})$ and $\text{Eu}^{3+}(\text{aq})$

Table S12: Coordination numbers in the first,  $\text{CN}_1$ , and second,  $\text{CN}_2$ , hydration shells of  $\text{La}^{3+}$  and  $\text{Eu}^{3+}$  in aqueous solution from literature sources.

| cation           | $\text{CN}_1$              | $\text{CN}_2$                                                                                                                 |
|------------------|----------------------------|-------------------------------------------------------------------------------------------------------------------------------|
| $\text{La}^{3+}$ | 9 <sup>9-16</sup>          | 11-13 <sup>17</sup> , 23.4 <sup>18</sup> , 25.6 <sup>19</sup> , 15.9 <sup>14</sup> , 18.8 <sup>16</sup> , 18 <sup>12,20</sup> |
| $\text{Eu}^{3+}$ | 8-9 <sup>10,14,16,20</sup> | 15.7 <sup>14</sup> , 19 <sup>16</sup> , 18 <sup>20</sup>                                                                      |

## Determination of Association Constants

Table S13: Calculated effective dipole moments for various types of ion pairs,  $\mu_{\text{IP,eff}}$ , of the studied lanthanide salts in aqueous solution using the CHS model.

|      | $\mu_{\text{IP,eff}} / \text{D}$ |                                 |                              |                                 |                                       |
|------|----------------------------------|---------------------------------|------------------------------|---------------------------------|---------------------------------------|
|      | $\text{LaCl}_2^+(\text{aq})$     | $\text{LaNO}_3^{2+}(\text{aq})$ | $\text{LaSO}_4^+(\text{aq})$ | $\text{EuNO}_3^{2+}(\text{aq})$ | $\text{Eu}_2\text{SO}_4^+(\text{aq})$ |
| CIP  | 36.3                             | 34.2                            | 41.5                         | 30.9                            | 37.4                                  |
| SIP  | 69.1                             | 68.4                            | 81.2                         | 67.2                            | 79.5                                  |
| 2SIP | 96.9                             | 96.3                            | 115.7                        | 95.4                            | 114.3                                 |

Table S14: Fitting parameters describing the dependence of  $K_i$  on  $I$  for the present aqueous lanthanide salt solutions at 25 °C.

|                        | LaCl <sup>2+</sup> (aq) |                          |  | LaNO <sub>3</sub> <sup>2+</sup> (aq) |             |  | LaSO <sub>4</sub> <sup>+</sup> (aq) |            |  | EuNO <sub>3</sub> <sup>2+</sup> (aq) |           |  | Eu <sub>2</sub> SO <sub>4</sub> <sup>+</sup> (aq) |            |  |
|------------------------|-------------------------|--------------------------|--|--------------------------------------|-------------|--|-------------------------------------|------------|--|--------------------------------------|-----------|--|---------------------------------------------------|------------|--|
|                        | B                       | C                        |  | B                                    | C           |  | B                                   | C          |  | B                                    | C         |  | B                                                 | C          |  |
| $K_{2\text{SIP}}(I)^a$ | -0.3 ± 0.1              | 0.05 ± 0.05 <sup>a</sup> |  | -0.83 ± 0.05                         | 0.28 ± 0.02 |  | -6.4 ± 0.3                          | 5.9 ± 0.5  |  | -                                    | -         |  | 0.3 ± 0.2                                         | -0.3 ± 0.4 |  |
| $K_{\text{SIP}}(I)^b$  | 0.14 ± 0.02             | -                        |  | 0.09 ± 0.06                          | -           |  | 0.2 ± 0.1                           | -          |  | -                                    | -         |  | 0 ± 0.1                                           | -          |  |
| $K_A(I)^a$             | -0.35 ± 0.09            | 0.1 ± 0.03               |  | -0.6 ± 0.1                           | 0.21 ± 0.05 |  | 1.4 ± 0.5                           | -1.3 ± 0.5 |  | -1.6 ± 0.4                           | 0.8 ± 0.3 |  | 0.2 ± 0.5                                         | -0.1 ± 0.6 |  |

<sup>a</sup>Eq. 14 in the main paper; <sup>b</sup>fitted empirically to  $\log K_{\text{SIP}}(I) = \log K_{\text{SIP}}^{\circ} + B \cdot I$

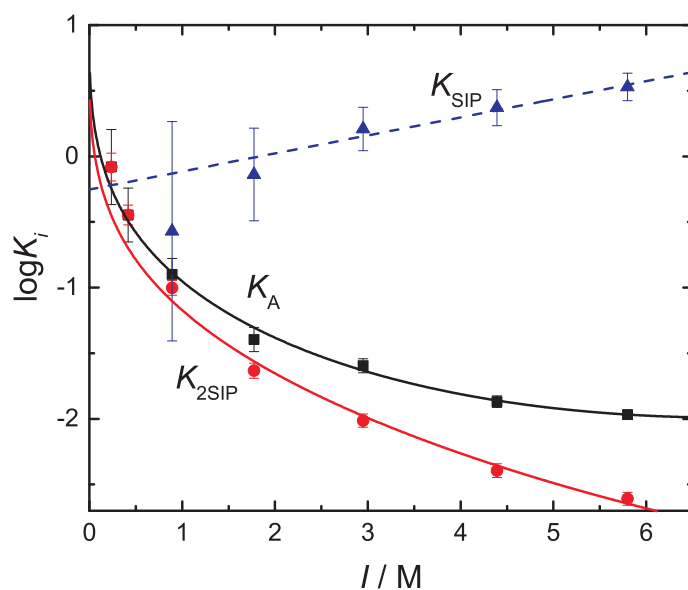

Figure S6: Step-wise formation constants,  $K_{2SIP}$  and  $K_{SIP}$ , and the overall association constant,  $K_A$ , of  $\text{LaCl}_2^+(\text{aq})$  at  $25^\circ\text{C}$  as a function of the stoichiometric ionic strength,  $I$ . Solid lines, Guggenheim-type equation (Eq. 14 main paper); dashed line, empirical straight-line fit.

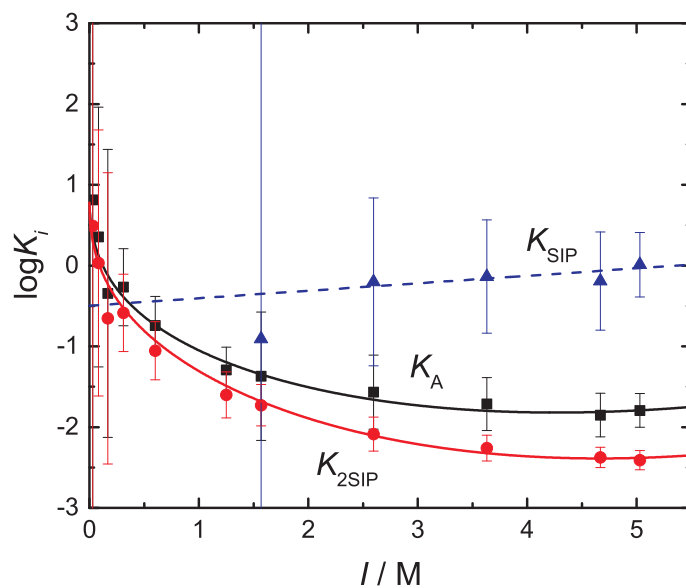

Figure S7: Step-wise formation constants,  $K_{2SIP}$  and  $K_{SIP}$ , and the overall association constant,  $K_A$ , of  $\text{LaNO}_3^{2+}(\text{aq})$  at  $25^\circ\text{C}$  as a function of the stoichiometric ionic strength,  $I$ . Solid lines, Guggenheim-type equation (Eq. 14 main paper); dashed line, empirical straight-line fit.



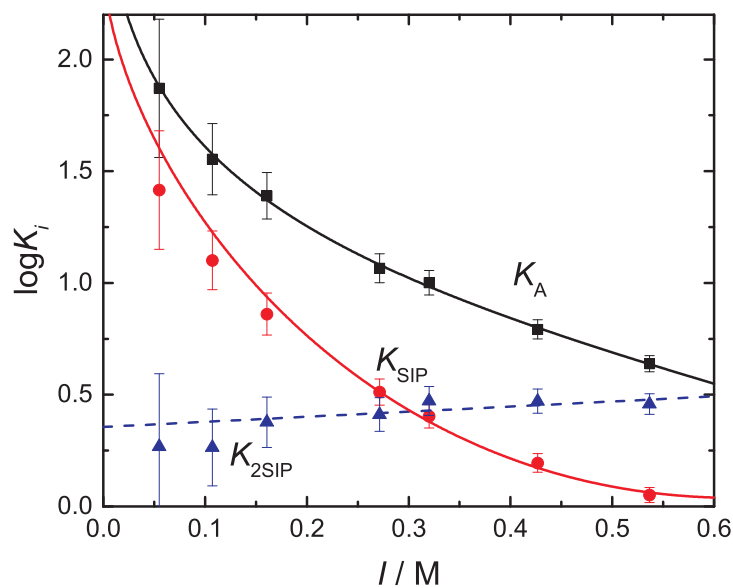

Figure S8: Step-wise formation constants,  $K_{2SIP}$  and  $K_{SIP}$ , and the overall association constant,  $K_A$ , of  $\text{LaSO}_4^+(\text{aq})$  at  $25^\circ\text{C}$  as a function of the stoichiometric ionic strength,  $I$ . Solid lines, Eq. Guggenheim-type equation (Eq. 14 main paper); dashed line, empirical straight-line fit.

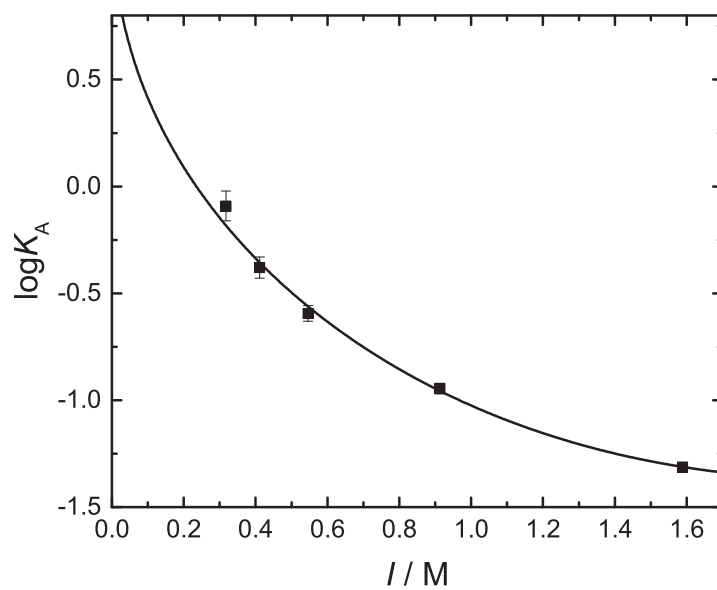

Figure S9: Overall association constant,  $K_A$ , of  $\text{EuNO}_3^{2+}(\text{aq})$  at  $25^\circ\text{C}$  as a function of the stoichiometric ionic strength,  $I$ .

# Bibliography

- [1] A. Y. Zaslavsky and R. Buchner, *J. Phys.: Condens. Matter*, 2011, **23**, 025903.
- [2] J. Hubbard and L. Onsager, *J. Chem. Phys.*, 1977, **67**, 4850–4857.
- [3] J. B. Hubbard, *J. Chem. Phys.*, 1978, **68**, 1649–1664.
- [4] J. B. Hubbard, P. Colonomos and P. G. Wolynes, *J. Chem. Phys.*, 1979, **71**, 2652–2661.
- [5] R. Buchner, T. Chen and G. Hefter, *J. Phys. Chem. B*, 2004, **108**, 2365–2375.
- [6] S. Schrödle, W. W. Rudolph, G. Hefter and R. Buchner, *Geochim. Cosmochim. Acta*, 2007, **71**, 5287–5300.
- [7] M. Sega, S. Kantorovich and A. Arnold, *Phys. Chem. Chem. Phys.*, 2015, **17**, 130–133.
- [8] Y. Marcus, *Ion Properties*, CRC Press, New York, 1997.
- [9] H. Grigoriev and S. Siekierski, *J. Phys. Chem.*, 1993, **97**, 5400–5402.
- [10] H. Ohtaki and T. Radnai, *Chem. Rev.*, 1993, **93**, 1157–1204.
- [11] T. Yamaguchi, M. Nomura, H. Wakita and H. Ohtaki, *J. Chem. Phys.*, 1998, **89**, 5153–5159.
- [12] J. Näslund, P. Lindqvist-Reis, I. Persson and M. Sandström, *Inorg. Chem.*, 2000, **39**, 4006–4011.
- [13] T. Kowall, F. Foglia, L. Helm and A. E. Merbach, *J. Am. Chem. Soc.*, 1995, **117**, 3790–3799.
- [14] C. Clavaguéra, R. Pollet, J. M. Soudan, V. Brenner and J. P. Dognon, *J. Phys. Chem. B*, 2005, **109**, 7614–7616.
- [15] M. Duvail, R. Spezia and P. Vitorge, *ChemPhysChem*, 2008, **9**, 693–696.
- [16] M. Duvail, P. Vitorge and R. Spezia, *J. Chem. Phys.*, 2009, **130**, 104501.

- [17] G. Johansson and H. Wakita, *Inorg. Chem.*, 1985, **24**, 3047–3052.
- [18] O. M. Lutz, T. S. Hofer, B. R. Randolph and B. M. Rode, *Chem. Phys. Lett.*, 2012, **536**, 50–54.
- [19] T. S. Hofer, H. Scharnagl, B. R. Randolph and B. M. Rode, *Chem. Phys.*, 2006, **327**, 31–42.
- [20] P. R. Smirnov and V. N. Trostin, *Russ. J. Gen. Chem.*, 2012, **82**, 360–378.
